# Supplementary material for: Ratiometric fluorescence detection of Hg2+ based on gold nanocluster/carbon quantum dots nanohybrids
Source: Royal Society of Chemistry journal article supplement (doi:10.1039/d3ay01966g), 2024-01-01
Supplement: d3ay01966g1.pdf [file d3ay01966g1.pdf]

## Supporting Information

### Ratiometric Fluorescent Detection of $\text{Hg}^{2+}$ Based on Gold Nanocluster/Carbon Quantum Dots Nanohybrids

Junyu Chen, Rui Tian\*, Duo Li, Xuehua Sun, Haoyu Li, Yuecheng Zhang

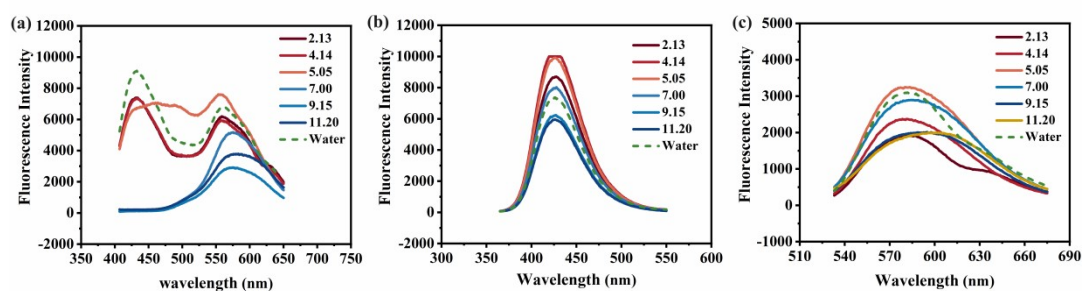

Fig. S1 Effect of pH and medium on the luminescence of (a) AuNCs/CQDs, (b) AuNCs and (c) CQDs.

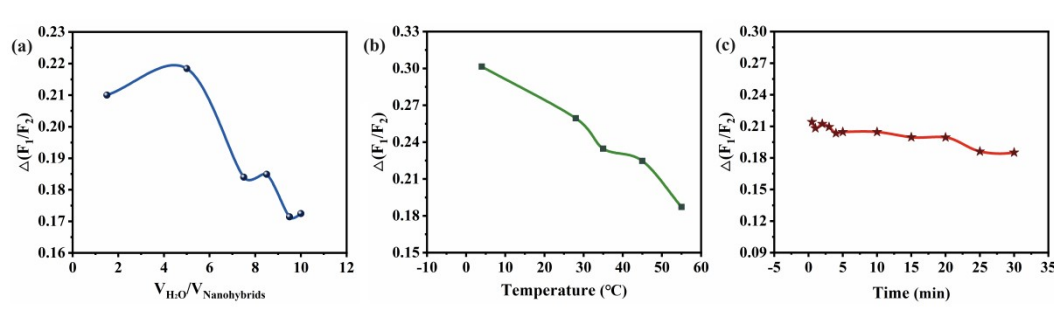

Fig. S2 Optimizing experimental conditions of (a)  $V_{\text{H}_2\text{O}}/V_{\text{Nanohybrids}}$ , (b) time and (c) temperature.
